# Supplementary material for: CompAnnotate: a comparative approach to annotate base-pairing interactions in RNA 3D structures
Source: PubMed Central journal article supplement — Nucleic Acids Res. 2017 Jun 21;45(14):e136. doi: 10.1093/nar/gkx538 (PMC5737500; doi:10.1093/nar/gkx538), 2017-06-21
Supplement: gkx538_supp.pdf [file gkx538_supp.pdf]

# Supplementary Data for “CompAnnotate: A comparative approach to annotate base pairing interactions in RNA 3D structures.”

Shahidul Islam, Ping Ge and Shaojie Zhang \*

## 1 Relevant atoms for acceptors, donors

To make geometric assesment, different atoms from the bases are considered. We call them *relevant atoms*. By default, we have included C1', C2 and C5 as *relevant atoms*, as they are available in all the bases, in similar positions. Additionally, we pick at most 2 pairs of closest *involved atoms* (defined in the next paragraph).

In the base pairing interactions, different atoms participate in the formation of hydrogen bonds. Which particular atoms are participating as the acceptors and the donors of a hydrogen bond, depend on the participating edges of nucleotides. As the structure data only contains heavy atoms information, the closest heavy ones to the participating atoms are considered as the *involved atoms* in CompAnnotate for the observed distance comparisons. From the interactions characteristics defined by Leontis et al. [1], a list of involved atoms for acceptors and donors has been extracted. For a set of well observed types of base pairs, participating atoms can be specified [1].

Those atoms have been used to define involved atoms in CompAnnotate analysis, whenever possible. Otherwise closest heavy involved atoms from the pair of bases for acceptors and donors has been considered. The list of all involved atoms for acceptors, donors for each bases are given in Table S1, and the corresponding edge-wise involved atom list for different bases are given in Table S2, S3, S4 and S5.

Table S1: Involved atoms in nucleotides

| Base | Acceptors  | Donors          |
|------|------------|-----------------|
| A    | N1, N3, N7 | N6, C2, C8, O2' |
| G    | N3, N7, O6 | N1, N2, C8, O2' |
| C    | N3, O2     | N4, C5, C6, O2' |
| U    | O2, O4     | N3, C5, O2'     |

---

\*To whom correspondence should be addressed. Tel: +1 407 8236095; Fax: +1 407 8235835; Email: shzhang@eecs.ucf.edu

Table S2: Involved atoms (Adenine)

| Edge      | Acceptors | Donors  |
|-----------|-----------|---------|
| W-C       | N1        | N6, C2  |
| Hoogsteen | N7        | N6, C8  |
| Sugar     | N1, N3    | C2, O2' |

Table S3: Involved atoms (Guanine)

| Edge      | Acceptors | Donors  |
|-----------|-----------|---------|
| W-C       | O6        | N1, N2  |
| Hoogsteen | O6, N7    | C8      |
| Sugar     | N3        | N2, O2' |

Table S4: Involved atoms (Cytosine)

| Edge      | Acceptors | Donors     |
|-----------|-----------|------------|
| W-C       | O2, N3    | N4         |
| Hoogsteen |           | N4, C5, C6 |
| Sugar     | O2        | O2'        |

Table S5: Involved atoms (Uracil)

| Edge      | Acceptors | Donors |
|-----------|-----------|--------|
| W-C       | O2, O4    | N3     |
| Hoogsteen | O4        | C5     |
| Sugar     | O2        | O2'    |

## 2 CompAnnotate performance without STAR3D alignment (using sequence-based alignment as the input)

Table S6 and S7 show the annotation sensitivity and precision when we replaced the STAR3D alignment with sequence based alignment in the CompAnnotate pipeline. It shows that CompAnnotate is not dependent on STAR3D to make improvement in base pairing annotation, even though it is obvious that STAR3D alignment gives the best possible outcome.

Table S6: The improvements in base-pairing annotation sensitivity for five tools by using CompAnnotate

| Method      | Base-pair Type | # of BP<br>in Benchmark | Regular             |              | CompAnnotate        |              |
|-------------|----------------|-------------------------|---------------------|--------------|---------------------|--------------|
|             |                |                         | # of BP<br>Detected | %            | # of BP<br>Detected | %            |
| MC-Annotate | Canonical      | 2578                    | 2063                | 80.02        | 2158                | <b>83.71</b> |
|             | Non-Canonical  | 1224                    | 334                 | 27.29        | 714                 | <b>58.33</b> |
| RNAView     | Canonical      | 2634                    | 2249                | 85.38        | 2254                | <b>85.57</b> |
|             | Non-Canonical  | 2782                    | 999                 | 35.91        | 1492                | <b>53.63</b> |
| FR3D        | Canonical      | 2622                    | 2343                | <b>89.36</b> | 2307                | 87.99        |
|             | Non-Canonical  | 2788                    | 1382                | 49.57        | 1710                | <b>61.33</b> |
| DSSR        | Canonical      | 2618                    | 2284                | 87.24        | 2287                | <b>87.36</b> |
|             | Non-Canonical  | 1640                    | 668                 | 40.73        | 976                 | <b>59.51</b> |
| ClaRNA      | Canonical      | 2518                    | 2085                | 82.80        | 2166                | <b>86.02</b> |
|             | Non-Canonical  | 1456                    | 500                 | 34.34        | 887                 | <b>60.92</b> |

Table S7: The improvements in base-pairing annotation precision for five tools by using CompAnnotate

| Method      | Base-pair Type | # of BP<br>in Benchmark | Regular            |       | CompAnnotate       |              |
|-------------|----------------|-------------------------|--------------------|-------|--------------------|--------------|
|             |                |                         | Match/<br>Conflict | %     | Match/<br>Conflict | %            |
| MC-Annotate | Canonical      | 2578                    | 2063/51            | 97.59 | 2158/28            | <b>98.72</b> |
|             | Non-Canonical  | 1224                    | 334/319            | 51.15 | 714/162            | <b>81.51</b> |
| RNAView     | Canonical      | 2634                    | 2249/153           | 93.63 | 2254/65            | <b>97.20</b> |
|             | Non-Canonical  | 2782                    | 999/1338           | 42.75 | 1492/569           | <b>72.39</b> |
| FR3D        | Canonical      | 2622                    | 2343/160           | 93.61 | 2307/55            | <b>97.67</b> |
|             | Non-Canonical  | 2788                    | 1382/1151          | 54.56 | 1710/471           | <b>78.40</b> |
| DSSR        | Canonical      | 2618                    | 2284/120           | 95.01 | 2287/38            | <b>98.37</b> |
|             | Non-Canonical  | 1640                    | 668/689            | 49.23 | 976/307            | <b>76.07</b> |
| ClaRNA      | Canonical      | 2518                    | 2085/27            | 98.72 | 2166/23            | <b>98.95</b> |
|             | Non-Canonical  | 1456                    | 500/203            | 71.12 | 887/118            | <b>88.26</b> |

### 3 Acceptance ratio of base-pairing inferability relations

Table S8, S9, S10 and S11 show the acceptance ratio for CompAnnotate (RNAView), CompAnnotate (FR3D), CompAnnotate (DSSR), CompAnnotate (ClaRNA).

Table S8: Acceptance ratios of different inferability relationship for RNAView annotation, using reference structure in PDB 3R8S for target structure in PDB 2B9N.

| Target (Ref.) | Relationship           | Total # of BP | Accepted # of BP | Accept % |
|---------------|------------------------|---------------|------------------|----------|
| Canonical     | Common                 | 673           | 673              | 100.00   |
|               | Inferable — Case 1     | 93            | 62               | 66.67    |
|               | Inferable — Case 2     | 49            | 1                | 2.04     |
|               | Non-Inferable — Case 1 | 57            | 0                | 0.00     |
|               | Non-Inferable — Case 2 | 17            | 17               | 100.00   |
| Non-Canonical | Common                 | 264           | 264              | 100.00   |
|               | Inferable — Case 1     | 634           | 341              | 53.79    |
|               | Inferable — Case 2     | 387           | 4                | 1.03     |
|               | Non-Inferable — Case 1 | 58            | 0                | 0.00     |
|               | Non-Inferable — Case 2 | 14            | 14               | 100.00   |

Table S9: Acceptance ratios of different inferability relationship for FR3D annotation, using reference structure in PDB 3R8S for target structure in PDB 2B9N.

| Target (Ref.) | Relationship           | Total # of BP | Accepted # of BP | Accept % |
|---------------|------------------------|---------------|------------------|----------|
| Canonical     | Common                 | 696           | 696              | 100.00   |
|               | Inferable — Case 1     | 70            | 40               | 57.14    |
|               | Inferable — Case 2     | 44            | 1                | 2.27     |
|               | Non-Inferable — Case 1 | 56            | 0                | 0.00     |
|               | Non-Inferable — Case 2 | 35            | 35               | 100.00   |
| Non-Canonical | Common                 | 384           | 384              | 100.00   |
|               | Inferable — Case 1     | 544           | 263              | 48.35    |
|               | Inferable — Case 2     | 367           | 2                | 0.54     |
|               | Non-Inferable — Case 1 | 68            | 0                | 0.00     |
|               | Non-Inferable — Case 2 | 25            | 25               | 100.00   |

Table S10: Acceptance ratios of different inferability relationship for DSSR annotation, using reference structure in PDB 3R8S for target structure in PDB 2B9N.

| Target (Ref.) | Relationship           | Total # of BP | Accepted # of BP | Accept % |
|---------------|------------------------|---------------|------------------|----------|
| Canonical     | Common                 | 684           | 684              | 100.00   |
|               | Inferable — Case 1     | 90            | 51               | 56.67    |
|               | Inferable — Case 2     | 44            | 1                | 2.27     |
|               | Non-Inferable — Case 1 | 56            | 0                | 0.00     |
|               | Non-Inferable — Case 2 | 21            | 21               | 100.00   |
| Non-Canonical | Common                 | 177           | 177              | 100.00   |
|               | Inferable — Case 1     | 382           | 203              | 53.14    |
|               | Inferable — Case 2     | 199           | 3                | 1.51     |
|               | Non-Inferable — Case 1 | 38            | 0                | 0.00     |
|               | Non-Inferable — Case 2 | 6             | 6                | 100.00   |

Table S11: Acceptance ratios of different inferability relationship for ClaRNA annotation, using reference structure in PDB 3R8S for target structure in PDB 2B9N.

| Target (Ref.) | Relationship           | Total # of BP | Accepted # of BP | Accept % |
|---------------|------------------------|---------------|------------------|----------|
| Canonical     | Common                 | 626           | 626              | 100.00   |
|               | Inferable — Case 1     | 124           | 81               | 65.32    |
|               | Inferable — Case 2     | 14            | 0                | 0.00     |
|               | Non-Inferable — Case 1 | 48            | 0                | 0.00     |
|               | Non-Inferable — Case 2 | 10            | 10               | 100.00   |
| Non-Canonical | Common                 | 113           | 113              | 100.00   |
|               | Inferable — Case 1     | 368           | 206              | 55.98    |
|               | Inferable — Case 2     | 72            | 0                | 0.00     |
|               | Non-Inferable — Case 1 | 24            | 0                | 0.00     |
|               | Non-Inferable — Case 2 | 3             | 3                | 100.00   |

## 4 Broke-down performance details of all data set for each method

The sensitivity and precision of the four datasets for each considered methods are given in Table S12, S13, S14, S15, S16, S16, S17, S18, S19, S20, S21. Here we can see how the annotation of a particular target RNA is improved.

Table S12: sensitivity compared for MC-Annotate annotation

| Method      | Base-pair Type | # of BP in Benchmark | Regular          |              | CompAnnotate     |              |
|-------------|----------------|----------------------|------------------|--------------|------------------|--------------|
|             |                |                      | # of BP Detected | %            | # of BP Detected | %            |
| 2B9N (3R8S) | Canonical      | 842                  | 622              | 73.87        | 683              | <b>81.12</b> |
|             | Non-Canonical  | 405                  | 91               | 22.47        | 233              | <b>57.53</b> |
| 2B9N (2ZJR) | Canonical      | 842                  | 622              | 73.87        | 691              | <b>82.07</b> |
|             | Non-Canonical  | 405                  | 91               | 22.47        | 205              | <b>50.62</b> |
| 1YL4 (4GD1) | Canonical      | 447                  | 402              | <b>89.93</b> | 400              | 89.49        |
|             | Non-Canonical  | 207                  | 69               | 33.33        | 127              | <b>61.35</b> |
| 2B9M (4GD1) | Canonical      | 447                  | 409              | <b>91.50</b> | 406              | 90.83        |
|             | Non-Canonical  | 207                  | 87               | 42.03        | 137              | <b>66.18</b> |

Table S13: precision compared for MC-Annotate annotation

| Method      | Base-pair Type | # of BP in Benchmark | Regular        |       | CompAnnotate   |              |
|-------------|----------------|----------------------|----------------|-------|----------------|--------------|
|             |                |                      | Match/Conflict | %     | Match/Conflict | %            |
| 2B9N (3R8S) | Canonical      | 842                  | 622/15         | 97.65 | 683/7          | <b>98.99</b> |
|             | Non-Canonical  | 405                  | 91/108         | 45.73 | 233/42         | <b>84.73</b> |
| 2B9N (2ZJR) | Canonical      | 842                  | 622/15         | 97.65 | 691/11         | <b>98.43</b> |
|             | Non-Canonical  | 405                  | 91/108         | 45.73 | 205/50         | <b>80.39</b> |
| 1YL4 (4GD1) | Canonical      | 447                  | 402/11         | 97.34 | 400/6          | <b>98.52</b> |
|             | Non-Canonical  | 207                  | 69/50          | 57.98 | 127/29         | <b>81.41</b> |
| 2B9M (4GD1) | Canonical      | 447                  | 409/10         | 97.61 | 406/7          | <b>98.31</b> |
|             | Non-Canonical  | 207                  | 87/37          | 70.16 | 137/33         | <b>80.59</b> |

Table S14: sensitivity compared for RNAView annotation

| Method      | Base-pair Type | # of BP<br>in Benchmark | Regular             |              | CompAnnotate        |              |
|-------------|----------------|-------------------------|---------------------|--------------|---------------------|--------------|
|             |                |                         | # of BP<br>Detected | %            | # of BP<br>Detected | %            |
| 2B9N (3R8S) | Canonical      | 854                     | 689                 | 80.68        | 709                 | <b>83.02</b> |
|             | Non-Canonical  | 917                     | 270                 | 29.44        | 467                 | <b>50.93</b> |
| 2B9N (2ZJR) | Canonical      | 854                     | 689                 | 80.68        | 715                 | <b>83.72</b> |
|             | Non-Canonical  | 917                     | 270                 | 29.44        | 452                 | <b>49.29</b> |
| 1YL4 (4GD1) | Canonical      | 463                     | 434                 | <b>93.74</b> | 425                 | 91.79        |
|             | Non-Canonical  | 474                     | 232                 | 48.95        | 268                 | <b>56.54</b> |
| 2B9M (4GD1) | Canonical      | 463                     | 430                 | <b>92.87</b> | 425                 | 91.79        |
|             | Non-Canonical  | 474                     | 237                 | 50.00        | 279                 | <b>58.86</b> |

Table S15: precision compared for RNAView annotation

| Method      | Base-pair Type | # of BP<br>in Benchmark | Regular            |       | CompAnnotate       |              |
|-------------|----------------|-------------------------|--------------------|-------|--------------------|--------------|
|             |                |                         | Match/<br>Conflict | %     | Match/<br>Conflict | %            |
| 2B9N (3R8S) | Canonical      | 854                     | 689/48             | 93.49 | 709/22             | <b>96.99</b> |
|             | Non-Canonical  | 917                     | 270/418            | 39.24 | 467/133            | <b>77.83</b> |
| 2B9N (2ZJR) | Canonical      | 854                     | 689/48             | 93.49 | 715/22             | <b>97.01</b> |
|             | Non-Canonical  | 917                     | 270/418            | 39.24 | 452/213            | <b>67.97</b> |
| 1YL4 (4GD1) | Canonical      | 463                     | 434/28             | 93.94 | 425/14             | <b>96.81</b> |
|             | Non-Canonical  | 474                     | 232/238            | 49.36 | 268/104            | <b>72.04</b> |
| 2B9M (4GD1) | Canonical      | 463                     | 430/31             | 93.28 | 425/15             | <b>96.59</b> |
|             | Non-Canonical  | 474                     | 237/212            | 52.78 | 279/110            | <b>71.72</b> |

Table S16: sensitivity compared for FR3D annotation

| Method      | Base-pair Type | # of BP<br>in Benchmark | Regular             |              | CompAnnotate        |              |
|-------------|----------------|-------------------------|---------------------|--------------|---------------------|--------------|
|             |                |                         | # of BP<br>Detected | %            | # of BP<br>Detected | %            |
| 2B9N (3R8S) | Canonical      | 857                     | 719                 | 83.90        | 724                 | <b>84.48</b> |
|             | Non-Canonical  | 916                     | 391                 | 42.69        | 523                 | <b>57.10</b> |
| 2B9N (2ZJR) | Canonical      | 857                     | 719                 | 83.90        | 736                 | <b>85.88</b> |
|             | Non-Canonical  | 916                     | 391                 | 42.69        | 525                 | <b>57.31</b> |
| 1YL4 (4GD1) | Canonical      | 454                     | 442                 | <b>97.36</b> | 436                 | 96.04        |
|             | Non-Canonical  | 478                     | 278                 | 58.16        | 311                 | <b>65.06</b> |
| 2B9M (4GD1) | Canonical      | 454                     | 442                 | <b>97.36</b> | 437                 | 96.26        |
|             | Non-Canonical  | 478                     | 330                 | 69.04        | 332                 | <b>69.46</b> |

Table S17: precision compared for FR3D annotation

| Method      | Base-pair Type | # of BP<br>in Benchmark | Regular            |       | CompAnnotate       |              |
|-------------|----------------|-------------------------|--------------------|-------|--------------------|--------------|
|             |                |                         | Match/<br>Conflict | %     | Match/<br>Conflict | %            |
| 2B9N (3R8S) | Canonical      | 857                     | 719/54             | 93.01 | 724/16             | <b>97.84</b> |
|             | Non-Canonical  | 916                     | 391/381            | 50.65 | 523/120            | <b>81.34</b> |
| 2B9N (2ZJR) | Canonical      | 857                     | 719/54             | 93.01 | 736/17             | <b>97.74</b> |
|             | Non-Canonical  | 916                     | 391/381            | 50.65 | 525/180            | <b>74.47</b> |
| 1YL4 (4GD1) | Canonical      | 454                     | 442/25             | 94.65 | 436/13             | <b>97.10</b> |
|             | Non-Canonical  | 478                     | 278/203            | 57.80 | 311/77             | <b>80.15</b> |
| 2B9M (4GD1) | Canonical      | 454                     | 442/24             | 94.85 | 437/12             | <b>97.33</b> |
|             | Non-Canonical  | 478                     | 330/148            | 69.04 | 332/82             | <b>80.19</b> |

Table S18: sensitivity compared for DSSR annotation

| Method      | Base-pair Type | # of BP<br>in Benchmark | Regular             |              | CompAnnotate        |              |
|-------------|----------------|-------------------------|---------------------|--------------|---------------------|--------------|
|             |                |                         | # of BP<br>Detected | %            | # of BP<br>Detected | %            |
| 2B9N (3R8S) | Canonical      | 854                     | 695                 | 81.38        | 713                 | <b>83.49</b> |
|             | Non-Canonical  | 532                     | 179                 | 33.65        | 303                 | <b>56.95</b> |
| 2B9N (2ZJR) | Canonical      | 854                     | 695                 | 81.38        | 720                 | <b>84.31</b> |
|             | Non-Canonical  | 532                     | 179                 | 33.65        | 297                 | <b>55.83</b> |
| 1YL4 (4GD1) | Canonical      | 455                     | 441                 | <b>96.92</b> | 431                 | 94.73        |
|             | Non-Canonical  | 288                     | 141                 | 48.96        | 174                 | <b>60.42</b> |
| 2B9M (4GD1) | Canonical      | 455                     | 438                 | <b>96.26</b> | 429                 | 94.29        |
|             | Non-Canonical  | 288                     | 171                 | 59.38        | 187                 | <b>64.93</b> |

Table S19: precision compared for DSSR annotation

| Method      | Base-pair Type | # of BP<br>in Benchmark | Regular            |       | CompAnnotate       |              |
|-------------|----------------|-------------------------|--------------------|-------|--------------------|--------------|
|             |                |                         | Match/<br>Conflict | %     | Match/<br>Conflict | %            |
| 2B9N (3R8S) | Canonical      | 854                     | 695/37             | 94.95 | 713/8              | <b>98.89</b> |
|             | Non-Canonical  | 532                     | 179/214            | 45.55 | 303/83             | <b>78.50</b> |
| 2B9N (2ZJR) | Canonical      | 854                     | 695/37             | 94.95 | 720/11             | <b>98.50</b> |
|             | Non-Canonical  | 532                     | 179/214            | 45.55 | 297/110            | <b>72.97</b> |
| 1YL4 (4GD1) | Canonical      | 455                     | 441/19             | 95.87 | 431/12             | <b>97.29</b> |
|             | Non-Canonical  | 288                     | 141/130            | 52.03 | 174/60             | <b>74.36</b> |
| 2B9M (4GD1) | Canonical      | 455                     | 438/21             | 95.42 | 429/13             | <b>97.06</b> |
|             | Non-Canonical  | 288                     | 171/107            | 61.51 | 187/60             | <b>75.71</b> |

Table S20: sensitivity compared for ClaRNA annotation

| Method      | Base-pair Type | # of BP<br>in Benchmark | Regular             |              | CompAnnotate        |              |
|-------------|----------------|-------------------------|---------------------|--------------|---------------------|--------------|
|             |                |                         | # of BP<br>Detected | %            | # of BP<br>Detected | %            |
| 2B9N (3R8S) | Canonical      | 818                     | 630                 | 77.02        | 683                 | <b>83.50</b> |
|             | Non-Canonical  | 479                     | 127                 | 26.51        | 280                 | <b>58.46</b> |
| 2B9N (2ZJR) | Canonical      | 818                     | 630                 | 77.02        | 687                 | <b>83.99</b> |
|             | Non-Canonical  | 479                     | 127                 | 26.51        | 258                 | <b>53.86</b> |
| 1YL4 (4GD1) | Canonical      | 441                     | 400                 | 90.70        | 402                 | <b>91.16</b> |
|             | Non-Canonical  | 249                     | 102                 | 40.96        | 158                 | <b>63.45</b> |
| 2B9M (4GD1) | Canonical      | 441                     | 419                 | <b>95.01</b> | 411                 | 93.20        |
|             | Non-Canonical  | 249                     | 144                 | 57.83        | 169                 | <b>67.87</b> |

Table S21: precision compared for ClaRNA annotation

| Method      | Base-pair Type | # of BP<br>in Benchmark | Regular            |              | CompAnnotate       |              |
|-------------|----------------|-------------------------|--------------------|--------------|--------------------|--------------|
|             |                |                         | Match/<br>Conflict | %            | Match/<br>Conflict | %            |
| 2B9N (3R8S) | Canonical      | 818                     | 630/5              | <b>99.21</b> | 683/8              | 98.84        |
|             | Non-Canonical  | 479                     | 127/56             | 69.40        | 280/38             | <b>88.05</b> |
| 2B9N (2ZJR) | Canonical      | 818                     | 630/5              | <b>99.21</b> | 687/8              | 98.85        |
|             | Non-Canonical  | 479                     | 127/56             | 69.40        | 258/40             | <b>86.58</b> |
| 1YL4 (4GD1) | Canonical      | 441                     | 400/10             | 97.56        | 402/6              | <b>98.53</b> |
|             | Non-Canonical  | 249                     | 102/41             | 71.33        | 158/22             | <b>87.78</b> |
| 2B9M (4GD1) | Canonical      | 441                     | 419/11             | 97.44        | 411/7              | <b>98.33</b> |
|             | Non-Canonical  | 249                     | 144/40             | 78.26        | 169/24             | <b>87.56</b> |

## References

- [1] Leontis, N. B., Stombaugh, J., and Westhof, E. (Aug, 2002) The non-Watson-Crick base pairs and their associated isostericity matrices. *Nucleic Acids Res.*, **30**(16), 3497–3531.
